# Supplementary material
Source: PubMed Central journal article supplement (PMC8029278)

Supp Fig 1

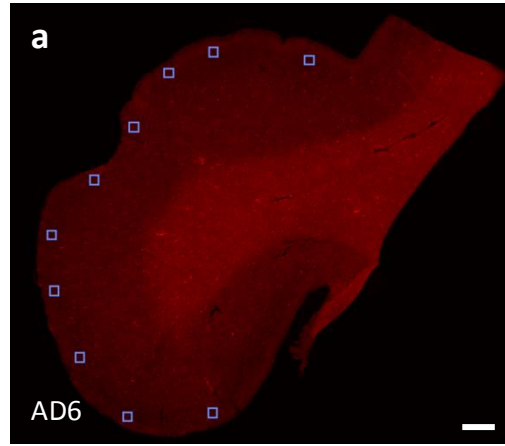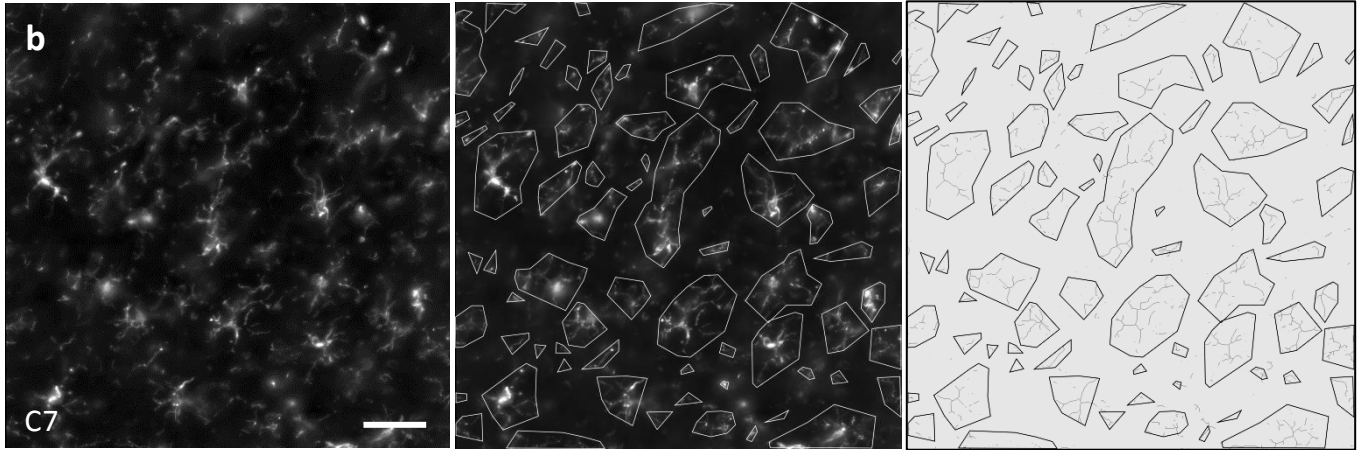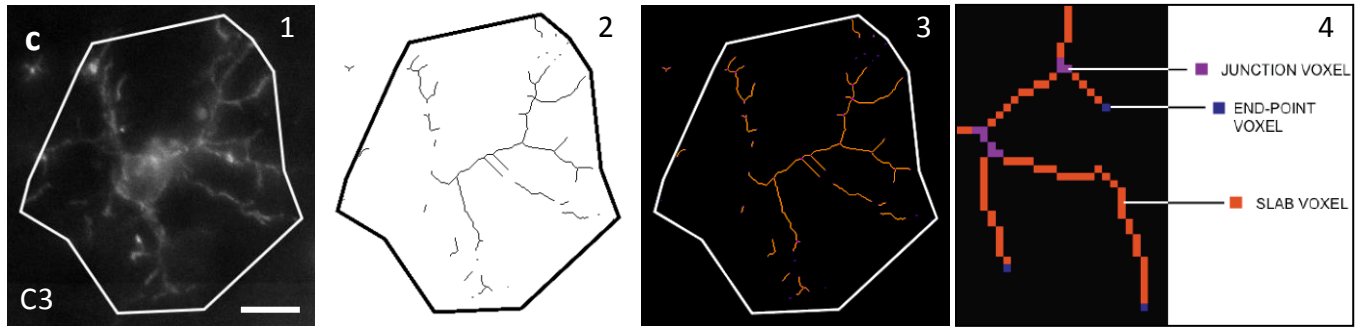

Supp Fig 2

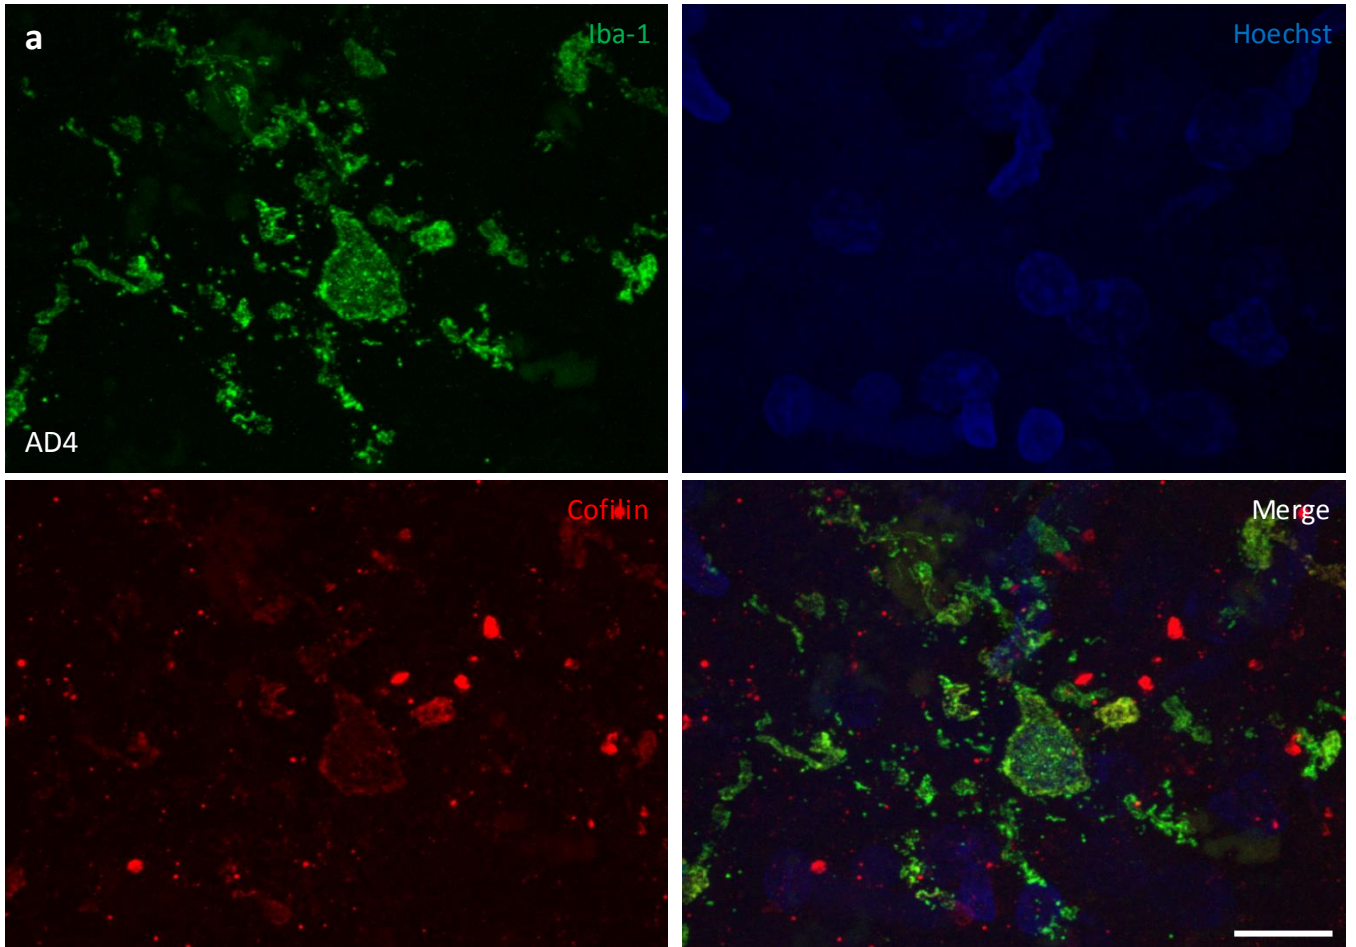

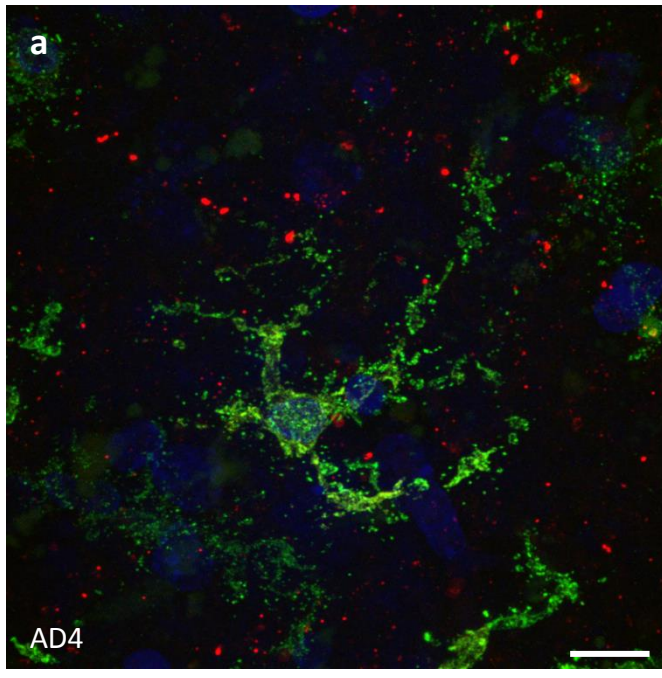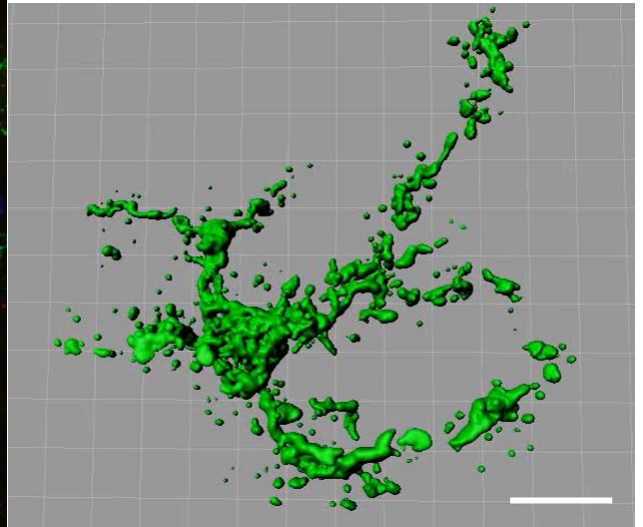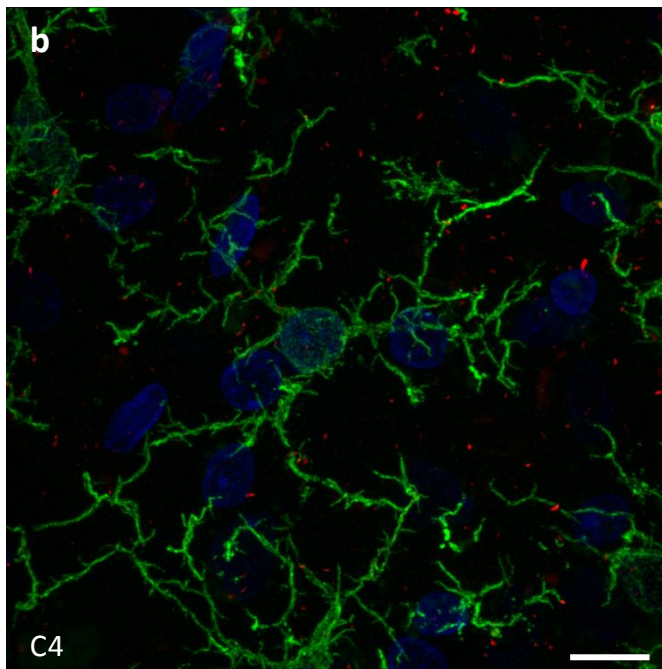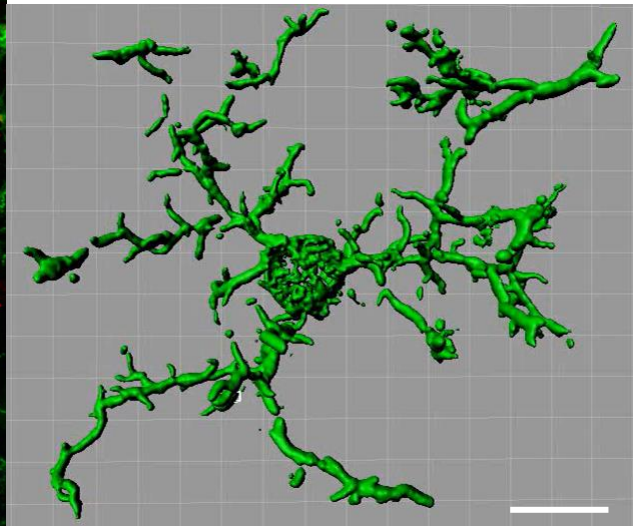

Supplement: BPA-27-795-s002.pdf [file BPA-27-795-s002.pdf]
